# Supplementary material for: Impact of Implicit Abdominal Aortic Aneurysm Screening in the Veterans Affairs Health Care System Over 10 Years
Source: PubMed Central journal article supplement — J Am Heart Assoc. 2022 Mar 29;11(7):e024571. doi: 10.1161/JAHA.121.024571 (PMC9075479; doi:10.1161/jaha.121.024571), 2022-03-29
Supplement: JAH3-11-e024571-s001.pdf [file JAH3-11-e024571-s001.pdf]

# **SUPPLEMENTAL MATERIAL**

**Data S1.**

**CPT Codes and Frequency of Screening Events**

| <u>Ultrasound Exams:</u>         | <u>All Vets</u> | <u>2005 Subgroup</u> |
|----------------------------------|-----------------|----------------------|
| 76706, G0389 - AAA Screening     | 107,453         | 3,604                |
| 76700 - Abdomen Complete         | 67,336          | 4,097                |
| 76705 - Abdomen Limited          | 87,408          | 4,563                |
| 93978 - Duplex Complete          | 22,731          | 1,147                |
| 93979 - Duplex Limited           | 12,438          | 625                  |
| 76770 - Retroperitoneal Complete | 109,364         | 6,069                |
| 76775 - Retroperitoneal Limited  | 109,683         | 5,090                |

CT, MRI, PET/CT Exams:

|                                             |         |        |
|---------------------------------------------|---------|--------|
| 74150, 74160, 74170 – CT Abdomen            | 166,946 | 13,266 |
| 74176, 74177, 74178 – CT Abdomen and Pelvis | 108,217 | 3,211  |
| 74175 – CTA Abdomen                         | 4,398   | 325    |
| 74174 – CTA Abdomen and Pelvis              | 1,999   | 55     |
| 75635 – CTA Abdomen and Pelvis with Runoff  | 7,041   | 377    |
| 74261, 74262, 74263 – CT Colonography       | 866     | 28     |
| 74181 ,74182, 74183 – MRI Abdomen           | 3,536   | 193    |
| 74185, C8900, C8901, C8902 – MRA Abdomen    | 3,303   | 262    |
| 78815, 78816 – PET/CT                       | 21,572  | 1,303  |

Aneurysm Repair:

*Endovascular*

34800, 34802, 34803, 34804, 34805, 34701, 34702, 34703, 34704, 34705, 34706, 34845, 34846, 34847,  
34848

*Open*

34830, 34831, 34832, 35081, 35082, 35091, 35092,

35102, 35103

**ICD-9, ICD-10 codes**

441.4, I71.4 – AAA

441.3, I74.3 – AAA rupture
